# Supplementary material for: Amniotic Fluid: A Perspective on Promising Advances in the Prevention and Treatment of Necrotizing Enterocolitis
Source: Frontiers journal article supplement (doi:10.3389/fped.2022.859805), 2022-03-14
Supplement: Table_1.pdf [file Table_1.pdf]

## SUPPLEMENTARY MATERIAL

**Supplementary table S1:** Critical appraisal of referenced animal studies on processed amniotic fluid and amniotic fluid stem cells using SYRCLE's tool for assessing risk of bias. Per domain the risk of bias is described as 'high', 'unclear' or 'low' (Hooijmans et al., 2014).

| Type                                         | Selection bias          |                          |                            | Performance bias   |              | Detection bias                |              | Attrition bias              | Reporting bias                  | Other              |
|----------------------------------------------|-------------------------|--------------------------|----------------------------|--------------------|--------------|-------------------------------|--------------|-----------------------------|---------------------------------|--------------------|
| Domain                                       | [1] Sequence generation | Baseline characteristics | [3] Allocation concealment | [4] Random housing | [5] Blinding | [6] Random outcome assessment | [7] Blinding | [8] Incomplete outcome data | [9] Selective outcome reporting | [10] Other sources |
| <b>Approach 1:</b> processed amniotic fluid  |                         |                          |                            |                    |              |                               |              |                             |                                 |                    |
| (23)                                         | Unclear                 | Low                      | Unclear                    | Unclear            | Unclear      | Unclear                       | Low          | Unclear                     | Low                             | Unclear            |
| (24)                                         | Unclear                 | Low                      | Unclear                    | Unclear            | Unclear      | Unclear                       | Low          | Unclear                     | Low                             | Unclear            |
| (25)                                         | Low                     | Low                      | Unclear                    | Unclear            | Unclear      | Low                           | Low          | Unclear                     | Low                             | Unclear            |
| (26)                                         | Low                     | Low                      | Unclear                    | Unclear            | Unclear      | Unclear                       | Unclear      | Unclear                     | Low                             | Unclear            |
| <b>Approach 2:</b> amniotic fluid stem cells |                         |                          |                            |                    |              |                               |              |                             |                                 |                    |
| (29)                                         | Low                     | Low                      | Unclear                    | Unclear            | Unclear      | Unclear                       | Low          | Unclear                     | Low                             | Unclear            |
| (30)                                         | Low                     | Low                      | Unclear                    | Unclear            | Unclear      | Unclear                       | Low          | Low                         | Low                             | Unclear            |
| (31)                                         | Low                     | Low                      | Unclear                    | Unclear            | Unclear      | Unclear                       | Low          | Unclear                     | Low                             | Unclear            |
| (32)                                         | Low                     | Low                      | Unclear                    | Unclear            | Unclear      | Unclear                       | Low          | Low                         | Low                             | Unclear            |
| (36)                                         | Unclear                 | Low                      | Unclear                    | Unclear            | Unclear      | Unclear                       | Low          | Low                         | Low                             | Unclear            |
| (37)                                         | Low                     | Low                      | Low                        | Unclear            | Unclear      | Unclear                       | Low          | Low                         | Low                             | Unclear            |
| (38)                                         | Unclear                 | Low                      | Unclear                    | Unclear            | Unclear      | Unclear                       | Low          | Low                         | Low                             | Unclear            |
| (39)                                         | Unclear                 | Low                      | Unclear                    | Unclear            | Unclear      | Unclear                       | Low          | Unclear                     | Low                             | Unclear            |

**Review authors judgement per domain:** [1] Was the allocation sequence adequately generated and applied?; [2] Were the groups similar at baseline or were they adjusted for confounders in the analysis?; [4] Was the allocation adequately concealed?; [5] Were the animals randomly housed during the experiment? [6] Were the caregivers and/or investigators blinded from knowledge which intervention each animal received during the experiment?; [7] Were animals selected at random for outcome assessment?; [8] Were incomplete outcome data adequately addressed?; [9] Are reports of the study free of selective outcome reporting?; [10] Was the study apparently free of other problems that could result in high risk of bias?
